# Supplementary material
Source: publisher site journal article supplement (https://www.dovepress.com/article/553006)
Supplement: Supplementary file 1 [file 553006%20Revised%20Supplementary.docx]

Supplement to: Psychometric Evaluation of the Celiac Disease Symptom Diary 2.1© Using Data from the Virtual Celiac Symptoms Study

Sonal Ghura, Dawn Weise Adams, Marilyn G Geller, Daniel A. Leffler, Edwin Liu,
Lori D. McLeod, Lisa M. Meckley, Muna J. Tahir, Ragy Saad, Nicholas J. Rockwood.

Submitted to: *Patient Related Outcome Measures*

# Contents:

**Supplementary Table 1.** VCSS Schedule of Assessments.

**Supplementary Table 2.** Demographic Characteristics at Screening.

**Supplementary Table 3.** Mean Weekly CDSD 2.1 Average Symptom Severity Scores (Adults and Adolescents).

**Supplementary Table 4.** Mean Weekly CDSD 2.1 Worst Symptom Severity Scores (Adults and Adolescents).

**Supplementary Table 5.** Mean Weekly CDSD 2.1 Frequency Scores (Adults and Adolescents).

**Supplementary Table 6.** Mean Weekly Average CDSD 2.1 Composite Scores (Adults and Adolescents).

**Supplementary Table 7.** Mean Weekly Worst CDSD 2.1 Composite Scores (Adults and Adolescents).

**Supplementary Table 8.** Inter-Item Correlations of CDSD 2.1 Items at Baseline (Adolescents).

**Supplementary Table 9.** Confirmatory Factor Analysis of CDSD 2.1 at Baseline and Week 3 (Adolescents).

**Supplementary Table 10.** Composite Score Reliability of CDSD 2.1 Items at Baseline (Adolescents).

**Supplementary Table 11.** Construct Validity (Convergent and Divergent) of CDSD 2.1 at Baseline and Week 3 (Adolescents).

**Supplementary Table 12.** Construct Validity (Known Groups) of CDSD 2.1 at Baseline (Adolescents).

**Supplementary Table 13.** Test-Retest Reliability of Weekly CDSD 2.1 Composite Scores (Adults and Adolescents Stable on PGIS).

**Supplementary Table 14.** CDSD 2.1 Responsiveness to Change Indicated by Change in PGIS Score (Adolescents).

**Supplementary Table 15.** Anchor- and Distribution-Based Estimates of Meaningful Within-Patient Change Thresholds for CDSD 2.1 Composite Scores (Adults).

**Supplementary Table 16.** Anchor- and Distribution-Based Estimates of Meaningful Within-Patient Change Thresholds for CDSD 2.1 Composite Scores (Adolescents).

**Supplementary Figure 1.** Empirical Cumulative Distribution Function Plot of Change in CDSD 2.1 Average GI Symptom Severity Scores from Baseline to Week 7 by Change in Collapsed PGIS (Adults).

**Supplementary Figure 2.** Empirical Cumulative Distribution Function Plot of Change in CDSD 2.1 Worst GI Symptom Severity Scores from Baseline to Week 7 by Change in Collapsed PGIS (Adults).

## **S****upplementary Table 1** VCSS Schedule of Assessments.

| **Schedule/Measure** | **Week** | | | | | | | | | | | | |
| --- | --- | --- | --- | --- | --- | --- | --- | --- | --- | --- | --- | --- | --- |
| **BL** | **1** | **2** | **3** | **4** | **5** | **6** | **7** | **8** | **9** | **10** | **11** | **12** |
| Daily |  |  |  |  |  |  |  |  |  |  |  |  |  |
| CDSD 2.1 | **x** | **x** | **x** | **x** | **x** | **x** | **x** | **x** | **x** | **x** | **x** | **x** | **x** |
| Gluten exposure | **x** | **x** | **x** | **x** | **x** | **x** | **x** | **x** | **x** | **x** | **x** | **x** | **x** |
| Weekly |  |  |  |  |  |  |  |  |  |  |  |  |  |
| PGIS Version 1.1 | **x** | **x** | **x** | **x** | **x** | **x** | **x** | **x** | **x** | **x** | **x** | **x** | **x** |
| Other time points |  |  |  |  |  |  |  |  |  |  |  |  |  |
| GSRSa | **x** | NA | NA | NA | NA | NA | NA | **x** | NA | NA | NA | NA | NA |
| CSIb | NA | NA | NA | **x** | NA | NA | NA | NA | NA | NA | NA | NA | NA |

aGSRS was measured at baseline and end of Week 7.

bCSI was measured at the end of Week 3.

**Abbreviations:** BL, baseline; CDSD 2.1, Celiac Disease Symptom Diary Version 2.1; CSI, Celiac Symptom Index; GSRS, Gastrointestinal Symptom Rating Scale; NA, not administered; PGIS, Patient Global Impression of Severity; VCSS, Virtual Celiac Symptoms Study.

## **Supplementary Table 2** Demographic Characteristics at Screening.

| Patient Characteristics | Total  (n = 480) | Adults  (n = 338) | Adolescents  (n = 142) |
| --- | --- | --- | --- |
| Age, years, mean (SD) | 31.0 (15.0) | 37.9 (12.5) | 15.0 (1.7) |
| Sex, n (%) | | | |
| Female | 392 (81.7) | 297 (87.9) | 95 (66.9) |
| Male | 88 (18.3) | 41 (12.1) | 47 (33.1) |
| BMI, kg/m2, mean (SD) | 25.4 (7.3) | 20.9 (4.3) | 27.3 (7.4) |
| Race, n (%)a | | | |
| American Indian | 9 (1.9) | 6 (1.8) | 3 (2.1) |
| Asian | 8 (1.7) | 3 (0.9) | 5 (3.5) |
| Black | 5 (1.0) | 3 (0.9) | 2 (1.4) |
| Native Hawaiian | 4 (0.8) | 1 (0.3) | 3 (2.1) |
| White | 472 (98.3) | 333 (98.5) | 139 (97.9) |
| Other | 11 (2.3) | 5 (1.5) | 6 (4.2) |
| How was your diagnosis confirmed?, n (%)a | | | |
| Biopsy | 461 (96.0) | 338 (100.0) | 123 (86.6) |
| Blood test | 423 (88.1) | 295 (87.3) | 128 (90.1) |
| Genetics | 92 (19.2) | 68 (20.1) | 24 (16.9) |
| Age in years at diagnosis, n (%) | | | |
| < 6 | 27 (5.6) | 2 (0.6) | 25 (17.6) |
| 6–11 | 86 (17.9) | 12 (3.6) | 74 (52.1) |
| 12–17 | 80 (16.7) | 37 (10.9) | 43 (30.3) |
| ≥ 18 | 287 (59.8) | 287 (84.9) | 0 (0.0) |
| Duration since diagnosis, years, mean (SD) | 6.7 (4.8) | 7.3 (5.2) | 5.4 (3.4) |
| Symptomology, n (%) | | | |
| I have chronic/ongoing celiac disease symptoms even when I don’t think I have been exposed to gluten | 102 (21.2) | 79 (23.4) | 23 (16.2) |
| I only have celiac disease symptoms while I am exposed to gluten or within a few days after being exposed to gluten | 194 (40.4) | 124 (36.7) | 70 (49.3) |
| I have chronic/ongoing celiac disease symptoms, but they are worse when I get exposed to gluten | 160 (33.3) | 123 (36.4) | 37 (26.1) |
| Other/unknown/not sure | 24 (5.0) | 12 (3.6) | 12 (8.5) |

aPatients could select more than one category.

**Abbreviations:** BMI, body mass index; SD, standard deviation.

## **Supplementary Table 3** Mean Weekly CDSD 2.1 Average Symptom Severity Scores (Adults and Adolescents).

| **CDSD 2.1 Weekly Score/Time Point** | **Adults** | | | | | | | **Adolescents** | | | | | | |
| --- | --- | --- | --- | --- | --- | --- | --- | --- | --- | --- | --- | --- | --- | --- |
| **n** | **Mean (SD)** | **Median** | **P25, P75** | **Observed min, max** | **Score min % / max %** | **Missing (%)** | **n** | **Mean (SD)** | **Median** | **P25, P75** | **Observed min, max** | **Score min % / max %** | **Missing (%)** |
| 1. Average Diarrhea Severity | | | | | | | | | | | | | | |
| Baseline | 338 | 0.5 (0.6) | 0.3 | 0.0, 0.8 | 0.0, 3.0 | 26.0/0.0 | 0 (0.0) | 142 | 0.3 (0.5) | 0.0 | 0.0, 0.4 | 0.0, 3.0 | 54.9/0.0 | 0 (0.0) |
| Week 3 | 324 | 0.5 (0.6) | 0.3 | 0.0, 0.8 | 0.0, 3.1 | 30.9/0.0 | 14 (4.1) | 137 | 0.3 (0.6) | 0.0 | 0.0, 0.4 | 0.0, 3.2 | 59.9/0.0 | 5 (3.5) |
| Week 7 | 313 | 0.4 (0.6) | 0.2 | 0.0, 0.7 | 0.0, 3.2 | 44.1/0.0 | 25 (7.4) | 126 | 0.3 (0.6) | 0.0 | 0.0, 0.2 | 0.0, 4.0 | 65.1/0.8 | 16 (11.3) |
| Baseline to Week 3 change | 324 | 0.0 (0.5) | 0.0 | −0.3, 0.2 | −2.1, 1.7 | − | 14 (4.1) | 137 | 0.0 (0.5) | 0.0 | 0.0, 0.1 | −1.3, 2.4 | − | 5 (3.5) |
| Baseline to Week 7 change | 313 | −0.1 (0.5) | 0.0 | −0.4, 0.1 | −2.0, 2.0 | − | 25 (7.4) | 126 | 0.0 (0.4) | 0.0 | −0.3, 0.0 | −1.1, 2.2 | − | 16 (11.3) |
| **2. Average Abdominal Pain Severity** | | | | | | | | | | | | | | |
| Baseline | 338 | 0.9 (0.7) | 0.7 | 0.3, 1.3 | 0.0, 3.4 | 11.5/0.0 | 0 (0.0) | 142 | 0.9 (0.8) | 0.7 | 0.3, 1.3 | 0.0, 4.0 | 16.9/0.7 | 0 (0.0) |
| Week 3 | 324 | 0.8 (0.7) | 0.7 | 0.2, 1.2 | 0.0, 4.0 | 18.2/0.3 | 14 (4.1) | 137 | 0.8 (0.9) | 0.5 | 0.0, 1.2 | 0.0, 4.0 | 29.9/1.5 | 5 (3.5) |
| Week 7 | 313 | 0.8 (0.7) | 0.6 | 0.1, 1.3 | 0.0, 3.3 | 22.7/0.0 | 25 (7.4) | 126 | 0.7 (0.9) | 0.3 | 0.0, 1.2 | 0.0, 4.0 | 31.0/1.6 | 16 (11.3) |
| Baseline to Week 3 change | 324 | 0.0 (0.6) | 0.0 | −0.3, 0.3 | −2.3, 1.8 | − | 14 (4.1) | 137 | −0.1 (0.6) | 0.0 | −0.4, 0.2 | −1.9, 1.6 | − | 5 (3.5) |
| Baseline to Week 7 change | 313 | −0.1 (0.6) | 0.0 | −0.4, 0.3 | −2.1, 1.9 | − | 25 (7.4) | 126 | −0.1 (0.6) | −0.1 | −0.5, 0.2 | −1.9, 1.4 | − | 16 (11.3) |
| **3. Average Bloating Severity** | | | | | | | | | | | | | | |
| Baseline | 338 | 1.0 (0.8) | 0.9 | 0.4, 1.6 | 0.0, 3.6 | 11.2/0.0 | 0 (0.0) | 142 | 0.7 (0.8) | 0.5 | 0.0, 1.0 | 0.0, 4.0 | 27.5/0.7 | 0 (0.0) |
| Week 3 | 324 | 0.9 (0.8) | 0.8 | 0.2, 1.4 | 0.0, 3.5 | 18.5/0.0 | 14 (4.1) | 137 | 0.7 (0.9) | 0.3 | 0.0, 1.1 | 0.0, 4.0 | 41.6/1.5 | 5 (3.5) |
| Week 7 | 313 | 0.9 (0.9) | 0.8 | 0.1, 1.5 | 0.0, 3.8 | 21.1/0.0 | 25 (7.4) | 126 | 0.6 (0.8) | 0.3 | 0.0, 1.0 | 0.0, 4.0 | 38.1/1.6 | 16 (11.3) |
| Baseline to Week 3 change | 324 | −0.1 (0.6) | 0.0 | −0.4, 0.3 | −2.1, 2.0 | − | 14 (4.1) | 137 | 0.0 (0.6) | 0.0 | −0.3, 0.2 | −1.5, 1.8 | − | 5 (3.5) |
| Baseline to Week 7 change | 313 | −0.1 (0.7) | 0.0 | −0.4, 0.3 | −2.1, 2.0 | − | 25 (7.4) | 126 | −0.1 (0.5) | 0.0 | −0.4, 0.1 | −1.9, 1.5 | − | 16 (11.3) |
| **4. Average Nausea Severity** | | | | | | | | | | | | | | |
| Baseline | 338 | 0.5 (0.6) | 0.2 | 0.0, 0.7 | 0.0, 3.9 | 37.9/0.0 | 0 (0.0) | 142 | 0.5 (0.7) | 0.2 | 0.0, 0.7 | 0.0, 3.0 | 33.1/0.0 | 0 (0.0) |
| Week 3 | 324 | 0.4 (0.6) | 0.1 | 0.0, 0.6 | 0.0, 3.7 | 47.2/0.0 | 14 (4.1) | 137 | 0.4 (0.7) | 0.1 | 0.0, 0.5 | 0.0, 3.4 | 48.2/0.0 | 5 (3.5) |
| Week 7 | 313 | 0.4 (0.6) | 0.1 | 0.0, 0.6 | 0.0, 3.0 | 45.7/0.0 | 25 (7.4) | 126 | 0.4 (0.7) | 0.1 | 0.0, 0.6 | 0.0, 4.0 | 49.2/0.8 | 16 (11.3) |
| Baseline to Week 3 change | 324 | 0.0 (0.5) | 0.0 | −0.3, 0.1 | −2.0, 1.9 | − | 14 (4.1) | 137 | 0.0 (0.6) | 0.0 | −0.2, 0.1 | −1.4, 1.9 | − | 5 (3.5) |
| Baseline to Week 7 change | 313 | 0.0 (0.6) | 0.0 | −0.3, 0.1 | −2.9, 2.0 | − | 25 (7.4) | 126 | 0.0 (0.6) | 0.0 | −0.2, 0.1 | −1.8, 3.5 | − | 16 (11.3) |
| **5. Average Tiredness Severity** | | | | | | | | | | | | | | |
| Baseline | 338 | 1.5 (0.8) | 1.4 | 0.9, 2.0 | 0.0, 4.0 | 1.5/0.3 | 0 (0.0) | 142 | 1.4 (0.9) | 1.2 | 0.7, 2.0 | 0.0, 4.0 | 2.1/0.7 | 0 (0.0) |
| Week 3 | 324 | 1.3 (0.9) | 1.2 | 0.6, 2.0 | 0.0, 4.0 | 7.7/0.9 | 14 (4.1) | 137 | 1.2 (1.1) | 1.0 | 0.2, 1.8 | 0.0, 4.0 | 20.4/4.4 | 5 (3.5) |
| Week 7 | 313 | 1.3 (0.9) | 1.2 | 0.6, 1.8 | 0.0, 4.0 | 10.2/0.3 | 25 (7.4) | 126 | 1.0 (1.0) | 1.0 | 0.0, 1.7 | 0.0, 4.0 | 26.2/3.2 | 16 (11.3) |
| Baseline to Week 3 change | 324 | −0.2 (0.6) | −0.2 | −0.6, 0.1 | −2.0, 2.3 | − | 14 (4.1) | 137 | −0.2 (0.6) | −0.2 | −0.7, 0.2 | −2.1, 1.8 | − | 5 (3.5) |
| Baseline to Week 7 change | 313 | −0.2 (0.6) | −0.1 | −0.6, 0.1 | −2.2, 2.1 | − | 25 (7.4) | 126 | −0.3 (0.7) | −0.3 | −0.7, 0.0 | −2.3, 1.7 | − | 16 (11.3) |

Score min %/max % corresponds to the percentage of patients who have the minimum and maximum possible scores, respectively. Only weeks that correspond to the administration of one or more supporting study COAs (i.e. weeks 0, 3 or 7) were used in the analyses.

**Abbreviations:** CDSD 2.1, Celiac Disease Symptom Diary Version 2.1; COA, clinical outcome assessment; max, maximum; min, minimum; P25, twenty-fifth percentile; P75, seventy-fifth percentile; SD, standard deviation.

## **Supplementary Table 4** Mean Weekly CDSD 2.1 Worst Symptom Severity Scores (Adults and Adolescents).

| **CDSD 2.1 Weekly Score/Time Point** | **Adults** | | | | | | | **Adolescents** | | | | | | |
| --- | --- | --- | --- | --- | --- | --- | --- | --- | --- | --- | --- | --- | --- | --- |
| **n** | **Mean (SD)** | **Median** | **P25, P75** | **Observed min, max** | **Score min % / max %** | **Missing (%)** | **n** | **Mean (SD)** | **Median** | **P25, P75** | **Observed min, max** | **Score min % / max %** | **Missing (%)** |
| **1. Worst Diarrhea Severity** | | | | | | | | | | | | | | |
| Baseline | 338 | 1.3 (1.1) | 1.0 | 0.0, 2.0 | 0.0, 4.0 | 26.0/3.3 | 0 (0.0) | 142 | 0.8 (1.1) | 0.0 | 0.0, 2.0 | 0.0, 4.0 | 54.9/2.1 | 0 (0.0) |
| Week 3 | 324 | 1.2 (1.1) | 1.0 | 0.0, 2.0 | 0.0, 4.0 | 30.9/3.4 | 14 (4.1) | 137 | 0.8 (1.2) | 0.0 | 0.0, 1.0 | 0.0, 4.0 | 59.9/4.4 | 5 (3.5) |
| Week 7 | 313 | 1.0 (1.1) | 1.0 | 0.0, 2.0 | 0.0, 4.0 | 44.1/2.6 | 25 (7.4) | 126 | 0.6 (1.0) | 0.0 | 0.0, 1.0 | 0.0, 4.0 | 65.1/1.6 | 16 (11.3) |
| Baseline to Week 3 change | 324 | −0.1 (1.2) | 0.0 | −1.0, 1.0 | −4.0, 4.0 | − | 14 (4.1) | 137 | −0.1 (1.2) | 0.0 | 0.0, 0.0 | −4.0, 4.0 | − | 5 (3.5) |
| Baseline to Week 7 change | 313 | −0.3 (1.2) | 0.0 | −1.0, 0.0 | −4.0, 3.0 | − | 25 (7.4) | 126 | −0.2 (1.2) | 0.0 | −1.0, 0.0 | −3.0, 4.0 | − | 16 (11.3) |
| **2. Worst Abdominal Pain Severity** | | | | | | | | | | | | | | |
| Baseline | 338 | 1.7 (1.0) | 2.0 | 1.0, 2.0 | 0.0, 4.0 | 11.5/4.7 | 0 (0.0) | 142 | 1.7 (1.1) | 2.0 | 1.0, 2.0 | 0.0, 4.0 | 16.9/4.9 | 0 (0.0) |
| Week 3 | 324 | 1.5 (1.1) | 1.0 | 1.0, 2.0 | 0.0, 4.0 | 18.2/4.6 | 14 (4.1) | 137 | 1.4 (1.2) | 1.0 | 0.0, 2.0 | 0.0, 4.0 | 29.9/7.3 | 5 (3.5) |
| Week 7 | 313 | 1.5 (1.1) | 1.0 | 1.0, 2.0 | 0.0, 4.0 | 22.7/3.2 | 25 (7.4) | 126 | 1.3 (1.2) | 1.0 | 0.0, 2.0 | 0.0, 4.0 | 31.0/6.3 | 16 (11.3) |
| Baseline to Week 3 change | 324 | −0.2 (1.0) | 0.0 | −1.0, 0.0 | −4.0, 3.0 | − | 14 (4.1) | 137 | −0.3 (1.1) | 0.0 | −1.0, 0.0 | −4.0, 2.0 | − | 5 (3.5) |
| Baseline to Week 7 change | 313 | −0.2 (1.1) | 0.0 | −1.0, 0.0 | −4.0, 3.0 | − | 25 (7.4) | 126 | −0.3 (1.2) | 0.0 | −1.0, 0.0 | −4.0, 4.0 | − | 16 (11.3) |
| **3. Worst Bloating Severity** | | | | | | | | | | | | | | |
| Baseline | 338 | 1.9 (1.1) | 2.0 | 1.0, 3.0 | 0.0, 4.0 | 11.2/6.8 | 0 (0.0) | 142 | 1.4 (1.1) | 1.0 | 0.0, 2.0 | 0.0, 4.0 | 27.5/4.9 | 0 (0.0) |
| Week 3 | 324 | 1.6 (1.1) | 2.0 | 1.0, 2.0 | 0.0, 4.0 | 18.5/5.2 | 14 (4.1) | 137 | 1.2 (1.2) | 1.0 | 0.0, 2.0 | 0.0, 4.0 | 41.6/5.8 | 5 (3.5) |
| Week 7 | 313 | 1.5 (1.1) | 2.0 | 1.0, 2.0 | 0.0, 4.0 | 21.1/4.5 | 25 (7.4) | 126 | 1.1 (1.1) | 1.0 | 0.0, 2.0 | 0.0, 4.0 | 38.1/2.4 | 16 (11.3) |
| Baseline to Week 3 change | 324 | −0.3 (1.1) | 0.0 | −1.0, 0.0 | −4.0, 3.0 | − | 14 (4.1) | 137 | −0.2 (1.1) | 0.0 | −1.0, 0.0 | −4.0, 3.0 | − | 5 (3.5) |
| Baseline to Week 7 change | 313 | −0.3 (1.1) | 0.0 | −1.0, 0.0 | −4.0, 3.0 | − | 25 (7.4) | 126 | −0.3 (1.0) | 0.0 | −1.0, 0.0 | −4.0, 2.0 | − | 16 (11.3) |
| **4. Worst Nausea Severity** | | | | | | | | | | | | | | |
| Baseline | 338 | 1.1 (1.1) | 1.0 | 0.0, 2.0 | 0.0, 4.0 | 37.9/4.1 | 0 (0.0) | 142 | 1.3 (1.2) | 1.0 | 0.0, 2.0 | 0.0, 4.0 | 33.1/6.3 | 0 (0.0) |
| Week 3 | 324 | 1.0 (1.2) | 1.0 | 0.0, 2.0 | 0.0, 4.0 | 47.2/5.2 | 14 (4.1) | 137 | 1.0 (1.2) | 1.0 | 0.0, 2.0 | 0.0, 4.0 | 48.2/4.4 | 5 (3.5) |
| Week 7 | 313 | 0.9 (1.1) | 1.0 | 0.0, 1.0 | 0.0, 4.0 | 45.7/2.9 | 25 (7.4) | 126 | 1.0 (1.2) | 1.0 | 0.0, 2.0 | 0.0, 4.0 | 49.2/6.3 | 16 (11.3) |
| Baseline to Week 3 change | 324 | −0.2 (1.2) | 0.0 | −1.0, 0.0 | −4.0, 4.0 | − | 14 (4.1) | 137 | −0.3 (1.2) | 0.0 | −1.0, 0.0 | −4.0, 4.0 | − | 5 (3.5) |
| Baseline to Week 7 change | 313 | −0.2 (1.2) | 0.0 | −1.0, 0.0 | −4.0, 4.0 | − | 25 (7.4) | 126 | −0.2 (1.3) | 0.0 | −1.0, 0.0 | −4.0, 4.0 | − | 16 (11.3) |
| **5. Worst Tiredness Severity** | | | | | | | | | | | | | | |
| Baseline | 338 | 2.3 (0.9) | 2.0 | 2.0, 3.0 | 0.0, 4.0 | 1.5/12.1 | 0 (0.0) | 142 | 2.4 (1.1) | 2.0 | 2.0, 3.0 | 0.0, 4.0 | 2.1/17.6 | 0 (0.0) |
| Week 3 | 324 | 2.0 (1.1) | 2.0 | 1.0, 3.0 | 0.0, 4.0 | 7.7/11.1 | 14 (4.1) | 137 | 1.8 (1.4) | 2.0 | 1.0, 3.0 | 0.0, 4.0 | 20.4/16.8 | 5 (3.5) |
| Week 7 | 313 | 1.9 (1.1) | 2.0 | 1.0, 3.0 | 0.0, 4.0 | 10.2/8.0 | 25 (7.4) | 126 | 1.6 (1.3) | 2.0 | 0.0, 3.0 | 0.0, 4.0 | 26.2/11.9 | 16 (11.3) |
| Baseline to Week 3 change | 324 | −0.3 (1.0) | 0.0 | −1.0, 0.0 | −3.0, 2.0 | − | 14 (4.1) | 137 | −0.6 (1.1) | −1.0 | −1.0, 0.0 | −4.0, 2.0 | − | 5 (3.5) |
| Baseline to Week 7 change | 313 | −0.4 (0.9) | 0.0 | −1.0, 0.0 | −3.0, 2.0 | − | 25 (7.4) | 126 | −0.8 (1.1) | −1.0 | −1.0, 0.0 | −4.0, 2.0 | − | 16 (11.3) |

Score min %/max % corresponds to the percentage of patients who have the minimum and maximum possible scores, respectively. Only weeks that correspond to the administration of one or more supporting study COAs (i.e. weeks 0, 3 or 7) were used in the analyses.

**Abbreviations:** CDSD 2.1, Celiac Disease Symptom Diary Version 2.1; COA, clinical outcome assessment; max, maximum; min, minimum; P25, twenty-fifth percentile; P75, seventy-fifth percentile; SD, standard deviation.

## **Supplementary Table 5** Mean Weekly CDSD 2.1 Frequency Scores (Adults and Adolescents).

| **CDSD 2.1 Weekly Score/Time Point** | **Adults** | | | | | | | **Adolescents** | | | | | | |
| --- | --- | --- | --- | --- | --- | --- | --- | --- | --- | --- | --- | --- | --- | --- |
| **n** | **Mean (SD)** | **Median** | **P25, P75** | **Observed min, max** | **Score min % / max %** | **Missing (%)** | **n** | **Mean (SD)** | **Median** | **P25, P75** | **Observed min, max** | **Score min % / max %** | **Missing (%)** |
| Vomiting Frequency | | | | | | | | | | | | | | |
| Baseline | 338 | 0.4 (2.3) | 0.0 | 0.0, 0.0 | 0.0, 36.2 | 88.5/− | 0 (0.0) | 142 | 0.3 (1.1) | 0.0 | 0.0, 0.0 | 0.0, 9.8 | 90.1/− | 0 (0.0) |
| Week 3 | 324 | 0.6 (2.3) | 0.0 | 0.0, 0.0 | 0.0, 28.0 | 88.0/− | 14 (4.1) | 137 | 0.5 (2.3) | 0.0 | 0.0, 0.0 | 0.0, 21.0 | 90.5/− | 5 (3.5) |
| Week 7 | 313 | 0.3 (2.7) | 0.0 | 0.0, 0.0 | 0.0, 46.0 | 92.0/− | 25 (7.4) | 126 | 0.4 (1.8) | 0.0 | 0.0, 0.0 | 0.0, 17.5 | 88.9/− | 16 (11.3) |
| Baseline to Week 3 change | 324 | 0.2 (1.9) | 0.0 | 0.0, 0.0 | −8.2, 15.0 | − | 14 (4.1) | 137 | 0.2 (2.5) | 0.0 | 0.0, 0.0 | −7.0, 21.0 | − | 5 (3.5) |
| Baseline to Week 7 change | 313 | −0.1 (1.3) | 0.0 | 0.0, 0.0 | −8.4, 9.8 | − | 25 (7.4) | 126 | 0.2 (1.9) | 0.0 | 0.0, 0.0 | −7.0, 17.5 | − | 16 (11.3) |
| **Bowel Movements Frequency** | | | | | | | | | | | | | | |
| Baseline | 338 | 16.2 (9.5) | 14.0 | 9.0, 20.0 | 1.0, 61.0 | 0.0/− | 0 (0.0) | 142 | 13.3 (8.0) | 11.7 | 7.0, 17.0 | 0.0, 47.8 | 0.7/− | 0 (0.0) |
| Week 3 | 324 | 15.5 (9.2) | 14.0 | 8.2, 20.0 | 0.0, 60.0 | 0.3/− | 14 (4.1) | 137 | 12.6 (8.6) | 11.2 | 7.0, 16.3 | 0.0, 47.6 | 0.7/− | 5 (3.5) |
| Week 7 | 313 | 15.1 (9.9) | 12.8 | 8.2, 19.2 | 0.0, 66.5 | 0.6/− | 25 (7.4) | 126 | 12.1 (8.6) | 10.0 | 7.0, 16.0 | 0.0, 45.0 | 1.6/− | 16 (11.3) |
| Baseline to Week 3 change | 324 | −0.8 (6.7) | −0.7 | −3.5, 2.9 | −40.4, 43.5 | − | 14 (4.1) | 137 | −0.6 (6.7) | 0.0 | −3.5, 2.7 | −25.4, 17.2 | − | 5 (3.5) |
| Baseline to Week 7 change | 313 | −1.0 (7.0) | −1.0 | −4.4, 3.0 | −37.2, 51.3 | − | 25 (7.4) | 126 | −1.1 (6.7) | −1.0 | −4.7, 2.6 | −33.0, 25.1 | − | 16 (11.3) |
| **Diarrhea Frequency** | | | | | | | | | | | | | | |
| Baseline | 338 | 6.6 (8.6) | 3.5 | 1.0, 8.2 | 0.0, 52.0 | 19.8/− | 0 (0.0) | 142 | 3.0 (5.4) | 1.0 | 0.0, 3.5 | 0.0, 34.0 | 47.2/− | 0 (0.0) |
| Week 3 | 324 | 5.4 (8.0) | 2.8 | 0.0, 7.0 | 0.0, 60.0 | 30.2/− | 14 (4.1) | 137 | 2.4 (5.3) | 0.0 | 0.0, 1.8 | 0.0, 31.5 | 57.7/− | 5 (3.5) |
| Week 7 | 313 | 4.7 (8.0) | 1.8 | 0.0, 5.6 | 0.0, 54.0 | 39.3/− | 25 (7.4) | 126 | 2.0 (4.6) | 0.0 | 0.0, 1.4 | 0.0, 22.2 | 66.7/− | 16 (11.3) |
| Baseline to Week 3 change | 324 | −1.3 (7.2) | 0.0 | −3.7, 1.8 | −34.0, 43.5 | − | 14 (4.1) | 137 | −0.6 (4.7) | 0.0 | −1.2, 0.0 | −21.8, 15.0 | − | 5 (3.5) |
| Baseline to Week 7 change | 313 | −1.7 (6.5) | −1.0 | −4.2, 0.2 | −32.2, 23.3 | − | 25 (7.4) | 126 | −0.8 (5.0) | 0.0 | −2.0, 0.0 | −26.0, 11.7 | − | 16 (11.3) |

Score min %/max % corresponds to the percentage of patients who have the minimum and maximum possible scores, respectively. Only weeks that correspond to the administration of one or more supporting study COAs (i.e. weeks 0, 3 or 7) were used in the analyses.

**Abbreviations:** CDSD 2.1, Celiac Disease Symptom Diary Version 2.1; COA, clinical outcome assessment; max, maximum; min, minimum; P25, 25th percentile; P75, 75th percentile; SD, standard deviation.

## **Supplementary Table 6** Mean Weekly Average CDSD 2.1 Composite Scores (Adults and Adolescents).

| **CDSD 2.1**  **Weekly Score/**  **Time Point** | **Adults** | | | | | | | **Adolescents** | | | | | | |
| --- | --- | --- | --- | --- | --- | --- | --- | --- | --- | --- | --- | --- | --- | --- |
| **n** | **Mean (SD)** | **Median** | **P25, P75** | **Observed min, max** | **Score min %/ max %** | **Missing (%)** | **n** | **Mean (SD)** | **Median** | **P25, P75** | **Observed min, max** | **Score min %/ max %** | **Missing (%)** |
| Average GI Symptom Severity | | | | | | | | | | | | | | |
| Baseline | 338 | 0.7 (0.5) | 0.6 | 0.3, 1.0 | 0.0, 3.2 | 3.3/0.0 | 0 (0.0) | 142 | 0.6 (0.5) | 0.5 | 0.2, 0.8 | 0.0, 2.7 | 7.0/0.0 | 0 (0.0) |
| Week 3 | 324 | 0.7 (0.5) | 0.6 | 0.3, 1.0 | 0.0, 3.0 | 6.5/0.0 | 14 (4.1) | 137 | 0.6 (0.6) | 0.4 | 0.1, 0.9 | 0.0, 3.1 | 20.4/0.0 | 5 (3.5) |
| Week 7 | 313 | 0.6 (0.6) | 0.5 | 0.2, 0.9 | 0.0, 3.0 | 12.5/0.0 | 25 (7.4) | 126 | 0.5 (0.6) | 0.3 | 0.0, 0.7 | 0.0, 3.3 | 20.6/0.0 | 16 (11.3) |
| Baseline to Week 3 change | 324 | −0.1 (0.4) | 0.0 | −0.3, 0.1 | −1.6, 1.5 | − | 14 (4.1) | 137 | 0.0 (0.4) | 0.0 | −0.2, 0.1 | −1.0, 1.5 | − | 5 (3.5) |
| Baseline to Week 7 change | 313 | −0.1 (0.4) | 0.0 | −0.3, 0.1 | −1.7, 1.5 | − | 25 (7.4) | 126 | −0.1 (0.4) | 0.0 | −0.3, 0.1 | −1.1, 1.4 | − | 16 (11.3) |
| Average Total Symptom Severity | | | | | | | | | | | | | | |
| Baseline | 338 | 0.9 (0.5) | 0.8 | 0.5, 1.2 | 0.0, 3.1 | 0.6/0.0 | 0 (0.0) | 142 | 0.7 (0.5) | 0.6 | 0.3, 1.1 | 0.0, 2.5 | 0.7/0.0 | 0 (0.0) |
| Week 3 | 324 | 0.8 (0.6) | 0.7 | 0.4, 1.1 | 0.0, 3.0 | 2.8/0.0 | 14 (4.1) | 137 | 0.7 (0.7) | 0.4 | 0.2, 1.0 | 0.0, 3.3 | 13.1/0.0 | 5 (3.5) |
| Week 7 | 313 | 0.8 (0.6) | 0.7 | 0.3, 1.1 | 0.0, 3.0 | 5.8/0.0 | 25 (7.4) | 126 | 0.6 (0.7) | 0.4 | 0.1, 0.9 | 0.0, 3.4 | 16.7/0.0 | 16 (11.3) |
| Baseline to Week 3 change | 324 | −0.1 (0.4) | −0.1 | −0.3, 0.1 | −1.4, 1.6 | − | 14 (4.1) | 137 | −0.1 (0.4) | −0.1 | −0.3, 0.1 | −1.0, 1.3 | − | 5 (3.5) |
| Baseline to Week 7 change | 313 | −0.1 (0.4) | −0.1 | −0.3, 0.1 | −1.5, 1.2 | − | 25 (7.4) | 126 | −0.1 (0.4) | −0.1 | −0.3, 0.1 | −1.2, 1.2 | − | 16 (11.3) |

Score min %/max % corresponds to the percentage of patients who have the minimum and maximum possible scores, respectively. Only weeks that correspond to the administration of one or more supporting study COAs (i.e. weeks 0, 3 or 7) were used in the analyses.

**Abbreviations:** CDSD 2.1, Celiac Disease Symptom Diary Version 2.1; COA, clinical outcome assessment; max, maximum; min, minimum; P25, 25th percentile; P75, 75th percentile; SD, standard deviation.

## **Supplementary Table 7** Mean Weekly Worst CDSD 2.1 Composite Scores (Adults and Adolescents).

| **CDSD 2.1**  **Weekly Score/**  **Time Point** | **Adults** | | | | | | | **Adolescents** | | | | | | |
| --- | --- | --- | --- | --- | --- | --- | --- | --- | --- | --- | --- | --- | --- | --- |
| **n** | **Mean (SD)** | **Median** | **P25, P75** | **Observed min, max** | **Score min %/ max %** | **Missing (%)** | **n** | **Mean (SD)** | **Median** | **P25, P75** | **Observed min, max** | **Score min %/ max %** | **Missing (%)** |
| Worst GI Symptom Severity | | | | | | | | | | | | | | |
| Baseline | 338 | 1.5 (0.8) | 1.5 | 1.0, 2.0 | 0.0, 4.0 | 3.3/0.9 | 0 (0.0) | 142 | 1.3 (0.8) | 1.2 | 0.8, 1.8 | 0.0, 3.8 | 7.0/0.0 | 0 (0.0) |
| Week 3 | 324 | 1.3 (0.9) | 1.2 | 0.8, 1.8 | 0.0, 4.0 | 6.5/0.9 | 14 (4.1) | 137 | 1.1 (1.0) | 1.0 | 0.2, 1.8 | 0.0, 4.0 | 20.4/0.7 | 5 (3.5) |
| Week 7 | 313 | 1.2 (0.9) | 1.0 | 0.5, 1.8 | 0.0, 4.0 | 12.5/0.6 | 25 (7.4) | 126 | 1.0 (0.9) | 0.9 | 0.2, 1.5 | 0.0, 3.8 | 20.6/0.0 | 16 (11.3) |
| Baseline  to Week 3 change | 324 | −0.2 (0.8) | −0.2 | −0.8, 0.2 | −3.8, 2.5 | − | 14 (4.1) | 137 | −0.2 (0.8) | −0.2 | −0.8, 0.2 | −2.5, 2.0 | − | 5 (3.5) |
| Baseline  to Week 7 change | 313 | −0.3 (0.8) | −0.2 | −0.8, 0.2 | −4.0, 2.2 | − | 25 (7.4) | 126 | −0.3 (0.8) | −0.2 | −0.5, 0.2 | −2.8, 1.8 | − | 16 (11.3) |
| Worst Total Symptom Severity | | | | | | | | | | | | | | |
| Baseline | 338 | 1.7 (0.8) | 1.6 | 1.2, 2.2 | 0.0, 4.0 | 0.6/0.6 | 0 (0.0) | 142 | 1.5 (0.8) | 1.4 | 0.8, 2.0 | 0.0, 3.8 | 0.7/0.0 | 0 (0.0) |
| Week 3 | 324 | 1.5 (0.9) | 1.4 | 0.8, 2.0 | 0.0, 4.0 | 2.8/0.9 | 14 (4.1) | 137 | 1.2 (1.0) | 1.0 | 0.6, 1.8 | 0.0, 4.0 | 13.1/0.7 | 5 (3.5) |
| Week 7 | 313 | 1.4 (0.8) | 1.2 | 0.8, 2.0 | 0.0, 4.0 | 5.8/0.6 | 25 (7.4) | 126 | 1.1 (1.0) | 1.0 | 0.4, 1.8 | 0.0, 3.8 | 16.7/0.0 | 16 (11.3) |
| Baseline to Week 3 change | 324 | −0.2 (0.7) | −0.2 | −0.6, 0.2 | −3.2, 2.2 | − | 14 (4.1) | 137 | −0.3 (0.7) | −0.2 | −0.6, 0.0 | −2.4, 1.6 | − | 5 (3.5) |
| Baseline to Week 7 change | 313 | −0.3 (0.7) | −0.2 | −0.8, 0.2 | −3.6, 2.0 | − | 25 (7.4) | 126 | −0.4 (0.8) | −0.4 | −0.8, 0.0 | −2.8, 1.6 | − | 16 (11.3) |

Score min %/max % corresponds to the percentage of patients who have the minimum and maximum possible scores, respectively. Only weeks that correspond to the administration of one or more supporting study COAs (i.e. weeks 0, 3 or 7) were used in the analyses.

**Abbreviations:** CDSD 2.1, Celiac Disease Symptom Diary Version 2.1; COA, clinical outcome assessment; max, maximum; min, minimum; P25, 25th percentile; P75, 75th percentile; SD, standard deviation.

##

## **Supplementary Table 8** Inter-Item Correlations of CDSD 2.1 Items at Baseline (Adolescents).

| **CDSD 2.1 Item** | **Correlation Coefficient (r)** | | | | | | | | | | | | |
| --- | --- | --- | --- | --- | --- | --- | --- | --- | --- | --- | --- | --- | --- |
| **1** | **2** | **3** | **4** | **5** | **6** | **7** | **8** | **9** | **10** | **11** | **12** | **13** |
| 1. Average Diarrhea Severity | − |  |  |  |  |  |  |  |  |  |  |  |  |
| 2. Average Abdominal Pain Severity | 0.38 | − |  |  |  |  |  |  |  |  |  |  |  |
| 3. Average Bloating Severity | 0.32 | 0.66 | − |  |  |  |  |  |  |  |  |  |  |
| 4. Average Nausea Severity | 0.15 | 0.64 | 0.49 | − |  |  |  |  |  |  |  |  |  |
| 5. Average Tiredness Severity | 0.23 | 0.63 | 0.52 | 0.55 | − |  |  |  |  |  |  |  |  |
| 6. Vomiting Frequency | 0.15 | 0.11 | −0.01 | 0.31 | 0.04 | − |  |  |  |  |  |  |  |
| 7. Bowel Movements Frequency | 0.39 | 0.17 | 0.02 | 0.08 | 0.08 | 0.02 | − |  |  |  |  |  |  |
| 8. Diarrhea Frequency | 0.60 | 0.23 | 0.10 | 0.11 | 0.10 | 0.15 | 0.51 | − |  |  |  |  |  |
| 9. Worst Diarrhea Severity | **0.85** | 0.35 | 0.26 | 0.12 | 0.14 | 0.11 | 0.33 | 0.58 | − |  |  |  |  |
| 10. Worst Abdominal Pain Severity | 0.43 | **0.87** | 0.56 | 0.61 | 0.52 | 0.18 | 0.17 | 0.24 | 0.52 | − |  |  |  |
| 11. Worst Bloating Severity | 0.31 | 0.56 | **0.90** | 0.45 | 0.52 | 0.09 | −0.02 | 0.09 | 0.30 | 0.58 | − |  |  |
| 12. Worst Nausea Severity | 0.16 | 0.55 | 0.34 | **0.82** | 0.45 | 0.35 | 0.13 | 0.12 | 0.18 | 0.68 | 0.41 | − |  |
| 13. Worst Tiredness Severity | 0.27 | 0.56 | 0.54 | 0.58 | **0.91** | 0.03 | 0.06 | 0.09 | 0.22 | 0.56 | 0.60 | 0.50 | − |

Moderate to strong correlations were ≥0.4. Bold values indicate strong correlation coefficients >0.80.

**Abbreviation:** CDSD 2.1©, Celiac Disease Symptom Diary Version 2.1.

## **Supplementary Table 9** Confirmatory Factor Analysis at Baseline (Adolescents).

| Scale/Item/Statistic | Factor Loading (SE)/Model Fit |
| --- | --- |
| **Average Total Symptom Severity** |  |
| 1. Average Diarrhea Severity | 0.38 (0.08) |
| 2. Average Abdominal Pain Severity | 0.90 (0.03) |
| 3. Average Bloating Severity | 0.73 (0.05) |
| 4. Average Nausea Severity | 0.71 (0.05) |
| 5. Average Tiredness Severity | 0.71 (0.05) |
| n | 142 |
| Chi-square, *df, P* value | 9.21, 5, 0.1010 |
| CFI | 0.98 |
| TLI | 0.97 |
| RMSEA (90% CI) | 0.08 (0.00, 0.15) |
| SRMR | 0.03 |
| **Average GI Symptom Severity** |  |
| 1. Average Diarrhea Severity | 0.39 (0.07) |
| 2. Average Abdominal Pain Severity | 0.95 (0.04) |
| 3. Average Bloating Severity | 0.70 (0.06) |
| 4. Average Nausea Severity | 0.67 (0.06) |
| n | 142 |
| Chi-square, *df, P* value | 5.53, 2, 0.0631 |
| CFI | 0.98 |
| TLI | 0.94 |
| RMSEA (90% CI) | 0.11 (0.00, 0.23) |
| SRMR | 0.03 |
| **Worst Total Symptom Severity** |  |
| 1. Worst Diarrhea Severity | 0.44 (0.08) |
| 2. Worst Abdominal Pain Severity | 0.91 (0.04) |
| 3. Worst Bloating Severity | 0.68 (0.05) |
| 4. Worst Nausea Severity | 0.70 (0.05) |
| 5. Worst Tiredness Severity | 0.70 (0.05) |
| n | 142 |
| Chi-square, *df, P* value | 23.99, 5, 0.0002 |
| CFI | 0.96 |
| TLI | 0.92 |
| RMSEA (90% CI) | 0.16 (0.10, 0.23) |
| SRMR | 0.04 |
| **Worst GI Symptom Severity** |  |
| 1. Worst Diarrhea Severity | 0.46 (0.08) |
| 2. Worst Abdominal Pain Severity | 1.05 (0.06) |
| 3. Worst Bloating Severity | 0.58 (0.06) |
| 4. Worst Nausea Severity | 0.65 (0.05) |
| n | 142 |
| Chi-square, *df, P* value | 5.31, 2, 0.0702 |
| CFI | 0.99 |
| TLI | 0.97 |
| RMSEA (90% CI) | 0.11 (0.00, 0.22) |
| SRMR | 0.03 |

**Abbreviations:** CFI, comparative fit index; CI, confidence interval; *df*, degrees of freedom; GI, gastrointestinal; RMSEA, root mean square error of approximation; SE, standard error; SRMR, standardized root mean squared residual; TLI, Tucker–Lewis Index.

## **Supplementary Table 10** Composite Score Reliability of CDSD 2.1 Items at Baseline (Adolescents).

| **Item** | **Average GI**  **Symptom Severity** | | **Average Total**  **Symptom Severity** | | **Worst GI**  **Symptom Severity** | | **Worst Total**  **Symptom Severity** | |
| --- | --- | --- | --- | --- | --- | --- | --- | --- |
| **Item Total, n** | **Alpha** | **Item Total, n** | **Alpha** | **Item Total, n** | **Alpha** | **Item Total, n** | **Alpha** |
| Scale |  | 0.77 |  | 0.82 |  | 0.72 |  | 0.77 |
| 1a. Average Diarrhea Severity | 0.34, 142 | 0.82 | 0.33, 142 | 0.84 | 0.56, 142 | − | 0.53, 142 | − |
| 2a. Average Abdominal Pain Severity | 0.77, 142 | 0.60 | 0.79, 142 | 0.72 | 0.75, 142 | − | 0.76, 142 | − |
| 3a. Average Bloating Severity | 0.65, 142 | 0.67 | 0.67, 142 | 0.76 | 0.67, 142 | − | 0.68, 142 | − |
| 4a. Average Nausea Severity | 0.57, 142 | 0.72 | 0.62, 142 | 0.78 | 0.67, 142 | − | 0.69, 142 | − |
| 5a. Average Tiredness Severity | 0.65, 142 | − | 0.65, 142 | 0.77 | 0.53, 142 | − | 0.66, 142 | − |
| 1b. Worst Diarrhea Severity | 0.45, 142 | − | 0.38, 142 | − | 0.34, 142 | 0.75 | 0.33, 142 | 0.80 |
| 2b. Worst Abdominal Pain Severity | 0.77, 142 | − | 0.75, 142 | − | 0.74, 142 | 0.52 | 0.75, 142 | 0.66 |
| 3b. Worst Bloating Severity | 0.72, 142 | − | 0.71, 142 | − | 0.51, 142 | 0.66 | 0.57, 142 | 0.72 |
| 4b. Worst Nausea Severity | 0.60, 142 | − | 0.59, 142 | − | 0.49, 142 | 0.68 | 0.53, 142 | 0.74 |
| 5b. Worst Tiredness Severity | 0.60, 142 | − | 0.73, 142 | − | 0.58, 142 | − | 0.58, 142 | 0.72 |

aThe alpha listed in bold is the alpha for the scale. The alpha listed for each item corresponds to the alpha that would be obtained if the item was removed from the scale.

**Abbreviations:** CDSD 2.1 indicates Celiac Disease Symptom Diary Version 2.1; GI, gastrointestinal.

## **Supplementary Table 11** Construct Validity (Convergent and Divergent) at Baseline and Week 3 (Adolescents).

| Week/ Supporting Measure | Correlation Coefficient (r), n of Patients | | | | | | |
| --- | --- | --- | --- | --- | --- | --- | --- |
| Average GI Symptom Severity | Average Total Symptom Severity | Worst GI Symptom Severity | Worst Total Symptom Severity | Vomiting Frequency | Bowel Movements Frequency | Diarrhea Frequency |
| GSRS Abdominal Pain | 0.76*, 142 | 0.78*, 142 | 0.74*, 142 | 0.76*, 142 | 0.11, 142 | 0.06, 142 | 0.21*, 142 |
| GSRS Reflux | 0.44*, 142 | 0.47*, 142 | 0.41*, 142 | 0.45*, 142 | 0.22*, 142 | −0.01, 142 | 0.09, 142 |
| GSRS Diarrhea | 0.49*, 142 | 0.45*, 142 | 0.57*, 142 | 0.55*, 142 | 0.13, 142 | 0.31*, 142 | 0.50*, 142 |
| GSRS Indigestion | 0.59*, 142 | 0.58*, 142 | 0.58*, 142 | 0.59*, 142 | 0.07, 142 | 0.11, 142 | 0.24*, 142 |
| GSRS Constipation | 0.56*, 142 | 0.57*, 142 | 0.49*, 142 | 0.51*, 142 | 0.01, 142 | 0.10, 142 | 0.20*, 142 |
| **Week 3** | | | | | | | |
| CSI Overall | 0.71*, 135 | 0.74*, 135 | 0.65*, 135 | 0.70*, 135 | 0.21*, 135 | 0.11, 135 | 0.22*, 135 |

* *p*<0.05.

**Abbreviations:** CDSD 2.1, Celiac Disease Symptom Diary Version 2.1; CSI, Celiac Symptom Index; GI, gastrointestinal; GSRS, Gastrointestinal Symptom Rating Scale.

## **Supplementary Table 12** Construct Validity (Known Groups) at Baseline (Adolescents).

| Known Group | Average GI Symptom Severity | | Average Total Symptom Severity | | Worst GI Symptom Severity | | Worst Total Symptom Severity | |
| --- | --- | --- | --- | --- | --- | --- | --- | --- |
| Mean (SD) | n | Mean (SD) | n | Mean (SD) | n | Mean (SD) | n |
| **PGIS** | | | | | | | | |
| 1 = No symptoms | 0.15 (0.24) | 27 | 0.29 (0.26) | 27 | 0.56 (0.68) | 27 | 0.84 (0.67) | 27 |
| 2 = Mild | 0.40 (0.27) | 61 | 0.57 (0.32) | 61 | 1.03 (0.59) | 61 | 1.25 (0.57) | 61 |
| 3 = Moderate | 0.81 (0.36) | 38 | 0.96 (0.42) | 38 | 1.73 (0.56) | 38 | 1.91 (0.55) | 38 |
| 4 = Severe | 1.38 (0.54) | 12 | 1.62 (0.52) | 12 | 2.31 (0.61) | 12 | 2.58 (0.55) | 12 |
| 5 = Very severe | 1.87 (0.59) | 4 | 1.98 (0.48) | 4 | 3.13 (0.48) | 4 | 3.20 (0.43) | 4 |
| ANOVA comparison  (overall), adjusted *P* value | <0.001 | | <0.001 | | <0.001 | | <0.001 | |

*P* values adjusted for multiple comparisons.

**Abbreviations:** ANOVA, analysis of variance; GI, gastrointestinal; PGIS, Patient Global Impression of Severity; SD, standard deviation.

## **Supplementary Table 13** Test-Retest Reliability of Weekly CDSD 2.1 Composite Scores (Adults and Adolescents Stable on PGIS).

| **CDSD 2.1 Weekly Score** | **Test-Retest ICC (95% CI)** | | |
| --- | --- | --- | --- |
| **Overall**  **(n = 256)** | **Adults**  **(n = 190)** | **Adolescents**  **(n = 66)** |
| Average GI Symptom Severity | 0.89 (0.86, 0.91) | 0.89 (0.85, 0.91) | 0.88 (0.81, 0.92) |
| Average Total Symptom Severity | 0.90 (0.88, 0.92) | 0.90 (0.87, 0.93) | 0.90 (0.84, 0.93) |
| Worst GI Symptom Severity | 0.77 (0.71, 0.81) | 0.76 (0.69, 0.81) | 0.78 (0.67, 0.86) |
| Worst Total Symptom Severity | 0.78 (0.72, 0.83) | 0.78 (0.71, 0.83) | 0.78 (0.66, 0.86) |

**Abbreviations:** CDSD 2.1, Celiac Disease Symptom Diary Version 2.1; CI, confidence interval; GI, gastrointestinal; ICC, intraclass correlation coefficient; PGIS, Patient Global Impression of Severity.

## Supplementary Table 14 CDSD 2.1 Responsiveness to Change Indicated by Change in PGIS Score (Adolescents).

| Week/Measure | Average GI Symptom Severity | | Average Total  Symptom Severity | | Worst GI  Symptom Severity | | Worst Total  Symptom Severity | |
| --- | --- | --- | --- | --- | --- | --- | --- | --- |
| n | Mean (SD) | n | Mean (SD) | n | Mean (SD) | n | Mean (SD) |
| **PGIS, Week 7** | | | | | | | | |
| ≥2-point improvement | 8 | −0.52 (0.27) | 8 | −0.56 (0.30) | 8 | −1.47 (0.80) | 8 | −1.52 (0.80) |
| 1‑point improvement | 25 | −0.14 (0.49) | 25 | −0.22 (0.49) | 25 | −0.58 (0.89) | 25 | −0.66 (0.85) |
| No change | 66 | −0.05 (0.27) | 66 | −0.11 (0.30) | 66 | −0.10 (0.59) | 66 | −0.21 (0.61) |
| 1‑point worsening | 22 | 0.12 (0.20) | 22 | 0.08 (0.22) | 22 | 0.12 (0.64) | 22 | 0.02 (0.65) |
| ≥2-point worsening | 3 | −0.45 (0.57) | 3 | −0.58 (0.54) | 3 | −0.58 (1.66) | 3 | −0.87 (1.72) |
| ANOVA comparison (overall), *P* value | <0.001 | | <0.001 | | <0.001 | | <0.001 | |

**Abbreviations:** CDSD 2.1, Celiac Disease Symptom Diary Version 2.1; CI, confidence interval; GI, gastrointestinal; PGIS, Patient Global Impression of Severity; SD, standard deviation.

## **Supplementary Table 15** Anchor- and Distribution-Based Estimates of Meaningful Within-Patient Change Thresholds for CDSD 2.1 Composite Scores (Adults).

| **Method** | **Meaningful Within-Patient Change Threshold Estimates** | | | |
| --- | --- | --- | --- | --- |
| **Average Total**  **Symptom**  **Severity** | **Average GI**  **Symptom**  **Severity** | **Worst Total**  **Symptom Severity** | **Worst GI Symptom**  **Severity** |
| Minimum possible change | 0.03 | 0.04 | 0.20 | 0.25 |
| **Anchor-based estimates:** | | | | |
| 1-point improvement on PGIS from baseline to Week 3 (mean, median) | ***−0.23, −0.20*** | ***−0.20, −0.18*** | ***−0.47, −0.40*** | ***−0.50, −0.50*** |
| 1-point improvement on PGIS from baseline to Week 7 (mean, median) | ***−0.32, −0.29*** | ***−0.31, −0.25*** | ***−0.70, −0.80*** | ***−0.70, −0.75*** |
| RMMM 1-point improvement on PGIS (least-squares mean) | ***−0.28*** | ***−0.27*** | ***−0.58*** | ***−0.60*** |
| **Distribution-based values:** | | | | |
| Half-SD | ***0.27*** | ***0.26*** | ***0.39*** | ***0.42*** |
| SEM | ***0.17*** | ***0.18*** | ***0.37*** | ***0.41*** |
| Threshold proposed | −0.32 | −0.31 | −0.80 | −0.75 |

Italicized cells indicate a monotonic ordering of the mean and median scores across the PGIS/CeD Severity groups with n≥5 (if applicable). Bold text indicates the correlation between changes on the anchor and CDSDv2.1 scores were greater than or equal to 0.37 (if applicable). Gray text indicates estimates that did not meet these criteria (when applicable) and were not considered when determining the threshold estimates.

The proposed threshold is equal to the largest estimate among those with adequate anchor relationships or the largest distribution-based estimate, if larger than the anchor estimates.

**Abbreviations:** CDSD 2.1, Celiac Disease Symptom Diary Version 2.1; CeD, celiac disease; GI, gastrointestinal; PGIS, Patient Global Impression of Severity; RMMM, repeated measures mixed model; SD, standard deviation; SEM, standard error of measurement.

## **Supplementary Table 16** Anchor- and Distribution-Based Estimates of Meaningful Within-Patient Change Thresholds for CDSD 2.1 Composite Scores (Adolescents).

| **Method** | **Meaningful Within-Patient Change Threshold Estimates** | | | |
| --- | --- | --- | --- | --- |
| **Average Total**  **Symptom**  **Severity** | **Average GI**  **Symptom**  **Severity** | **Worst Total**  **Symptom**  **Severity** | **Worst GI**  **Symptom**  **Severity** |
| Minimum possible change | 0.03 | 0.04 | 0.20 | 0.25 |
| **Anchor-based estimates** | | | | |
| 1-point improvement on PGIS from baseline to Week 3 (mean, median) | −0.11, −0.12 | −0.12, −0.13 | −0.29, −0.20 | −0.33, −0.25 |
| 1-point improvement on PGIS from baseline to Week 7 (mean, median) | *−0.22, −0.27* | *−0.14, −0.25* | *−0.66,*  *−0.60* | ***−0.58, −0.50*** |
| RMMM 1-point improvement on PGIS (least-squares mean) | ***−0.21*** | ***−0.16*** | ***−0.58*** | ***−0.53*** |
| **Distribution-based values** | | | | |
| Half-SD | ***0.27*** | ***0.26*** | ***0.41*** | ***0.42*** |
| SEM | ***0.18*** | ***0.18*** | ***0.39*** | ***0.40*** |
| Threshold proposed | **−0.27** | **−0.26** | **−0.58** | **−0.58** |

Italicized cells indicate a monotonic ordering of the mean and median scores across the PGIS/CeD Severity groups with n≥5 (if applicable). Bold text indicates the correlation between changes on the anchor and CDSD 2.1 scores were greater than or equal to 0.37 (if applicable). Gray text indicates estimates that did not meet these criteria (when applicable) and were not considered when determining the threshold estimates.

The proposed threshold is equal to the largest estimate among those with adequate anchor relationships or the largest distribution-based estimate, if larger than the anchor estimates.

**Abbreviations:** CDSD 2.1, Celiac Disease Symptom Diary Version 2.1; CeD, celiac disease; GI, gastrointestinal; PGIS, Patient Global Impression of Severity; RMMM, repeated measures mixed model; SD, standard deviation; SEM, standard error of measurement.

## **Supplementary Figure 1** Empirical Cumulative Distribution Function Plot of Change in CDSD 2.1 Average GI Symptom Severity Scores from Baseline to Week 7 By Change in Collapsed PGIS Score (Adults)

**
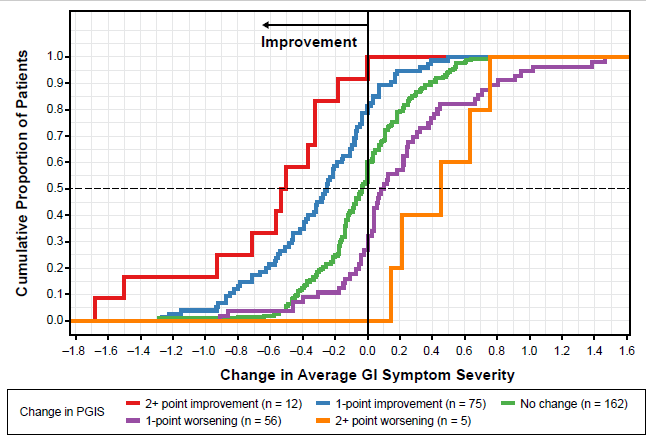
**

**Abbreviations:** CDSD 2.1, Celiac Disease Symptom Diary Version 2.1; GI, gastrointestinal; PGIS, Patient Global Impression of Severity.

## **Supplementary Figure 2** Empirical Cumulative Distribution Function Plot of Change in CDSD 2.1 Worst GI Symptom Severity Scores from Baseline to Week 7 by Change in Collapsed PGIS Score (Adults)

**
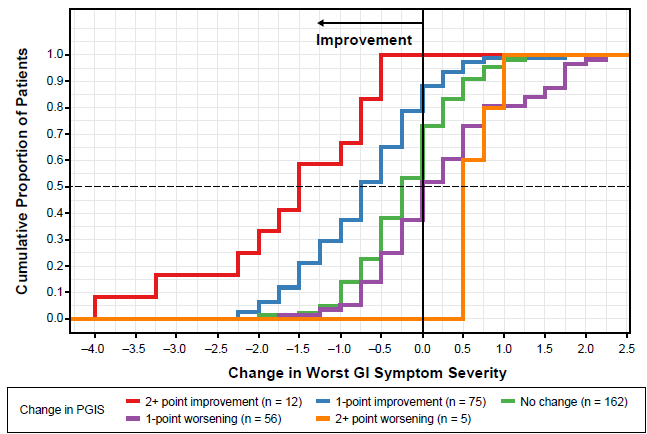
**

**Abbreviations:** CDSD 2.1, Celiac Disease Symptom Diary Version 2.1; GI, gastrointestinal; PGIS, Patient Global Impression of Severity.
